# Supplementary material for: A KBr-impregnated paper substrate as a sample probe for the enhanced ATR-FTIR signal strength of anionic and non-ionic surfactants in an aqueous medium
Source: Royal Society of Chemistry journal article supplement (doi:10.1039/d0ra07286a), 2020-01-01
Supplement: d0ra07286a1.pdf [file d0ra07286a1.pdf]

**Supplementary materials**

**KBr-impregnated paper substrate as sample probe for enhanced  
ATR-FTIR signal strength of anionic and non-ionic surfactants in  
aqueous medium**

**RamsinghKurrey<sup>\*a</sup>, Manas Kanti Deb<sup>\*a</sup>, Kamlesh Shrivasa, Jayant Nirmalkar<sup>b</sup>,  
Bhupendra Kumar Sen<sup>c</sup>, MithleshMahilang<sup>a</sup>andVikas Kumar Jain<sup>d</sup>**

<sup>a</sup>School of Studies in Chemistry, Pt. Ravishankar Shukla University Raipur-492 010, Chhattisgarh,  
India

<sup>b</sup>Korea Research Institute of Standards and Science, Yuseong, District, Daejeon, South Korea

<sup>c</sup>Department of Chemistry, Govt. D. B. Girls' PG Autonomous College, Raipur-492 001,  
Chhattisgarh, India

<sup>d</sup>Department of Chemistry, Govt. Engineering College, Raipur-492015, Chhattisgarh, India

**\*Corresponding Authors**

Email: [debmanas@yahoo.com](mailto:debmanas@yahoo.com) (**M. K. Deb**)

Contact : +91 9425503750

Email: [ramsinghkurrey@gmail.com](mailto:ramsinghkurrey@gmail.com) (**R. Kurrey**)

Contact : +91 8889629675

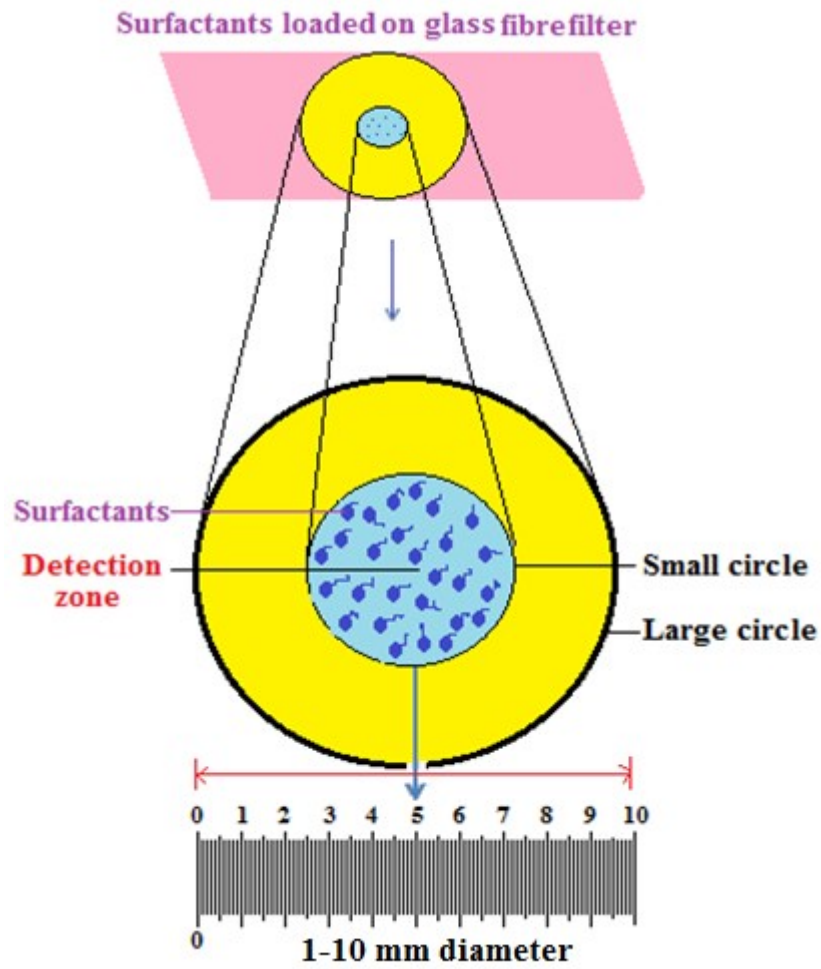

**Fig. S1.** The testing sheet consisting 5 mm diameter hydrophilic area for samples pre-concentration

## SEM-EDX analysis

The micro-structure and elemental composition of paper before and after addition of AS and NS were confirmed using SEM-EDX as depicted in Fig. S2 (a-b). After air-dried, the samples were passed through a 0.65 micrometer of filter paper. Then, samples were mounted on stubs with conductive carbon tape and coated with carbon.<sup>1</sup> All samples were analyzed for their micro-structure and elemental compositions under JEOL JSM-6701F FE-SEM operating at 15 kV. The surface morphology of GFF paper was observed to be smooth and regular with fewer undulations after the AS and NS were subjected to adsorption process at various magnifications ranging from X3000-5000. EDX spectrum shows the presence of oxygen (O), silicon (Si), carbon (C), magnesium (Mg), sodium (Na), barium (Ba), aluminium (Al), sulphur (S), potassium (K), Bromide (Br) and calcium (Ca). The weight percentage (wt %) of all elements before AS and NS adsorption is investigated in the following order: O (60.30%) > Si (39.97%) > Br (32.07%) > C (10.03%). Similarly, the wt% of all elements present in GFF after adsorption was investigated as following order: O (60.01%) > Si (30.35%) > Mg (15.00%) > Na (10.21%) > Ba (8.54%) > Al (8.14%) > S (7.02%) > K (5.85%) > Br (4.93%) > Ca (5.02%), shown in Fig. S2 (a-b). It is apparent in the inserted part of Fig. S2(a) that oxygen (O) and silicon (Si) atom is dominant in the component, and there are trace amounts of carbon (C) atom present in the GFF, which is similar to that of after deposition AS and NS on KBr-impregnated paper substrate (Fig. S2(b)). This approach confirmed the adsorption of AS and NS on the surface of paper substrate and the interaction of silicate (SiO<sub>4</sub>) containing KBr-impregnated paper surface with analytes.

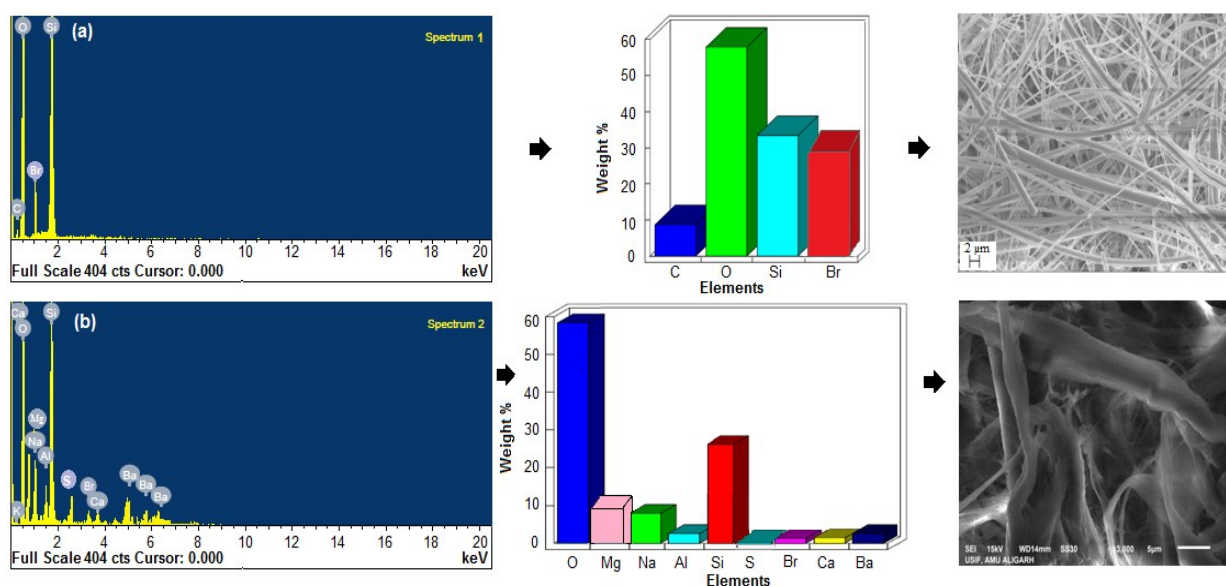

**Fig. S2.** SEM-EDX analysis of KBr-impregnated paper substrate before adsorption (a); and after adsorption (b) of mixed AS and NS at the magnification of X3000.

## **Physical phenomenon for effective adsorption of surfactants onto GFF paper substrate**

Based on physical phenomenon, the reason for enhancement of IR signal is that the crystal must have a higher refractive index than the specimen. It is to be noted that mixed AS and NS strongly adsorbed on paper in the wavelength range of 4000-900  $\text{cm}^{-1}$ . The paper substrate served to increase IR signals of mixed AS and NS due to the higher interaction of evanescent wave of the reflected radiation with KBr-impregnated paper surface. The adsorption (penetration depth 0.5 micron to several microns) of AS and NS onto the paper substrate contributes an additional signal enhancement when the infra-red light directly contacts with the AS and NS loaded on paper substrate. The incident IR radiation penetrates into the sample depending on wavelength and refraction indices of both ATR element as well as sample-penetration depth with not more than a few microns, Ventura-Gayetea et al. 2004.<sup>2</sup> Thus, ATR spectra shows the information of smooth surface of paper substrate. Further, since the density and pathlength of KBr substrate, which are directly proportional to the intensity of IR radiation, ultimately reflect to the variations in the analytical results, we have measured the standard deviation and other statistical parameters towards accuracy and precision of the results with great acceptability. The methods described here can also be used for detecting the presence of water in a sample. It is largely undesirable to have water in a sample being analyzed using FTIR with ATR accessories based methods as water can affect the accuracy of quantification of AS and NS. In a representative experiment, 20  $\mu\text{L}$  of a 100  $\mu\text{g L}^{-1}$  mixed AS and NS solution in ultrapure water was directly placed within the ZnSe crystal for measurement of ATR-FTIR spectrometer. A broad absorption band due to the presence of  $\text{H}_2\text{O}$  is always observed. Actually, aqueous solutions can have a problem of uniform drying and obtaining a uniform distribution of analytes on the detection zone of the crystal being exposed to an IR signal.<sup>3</sup>

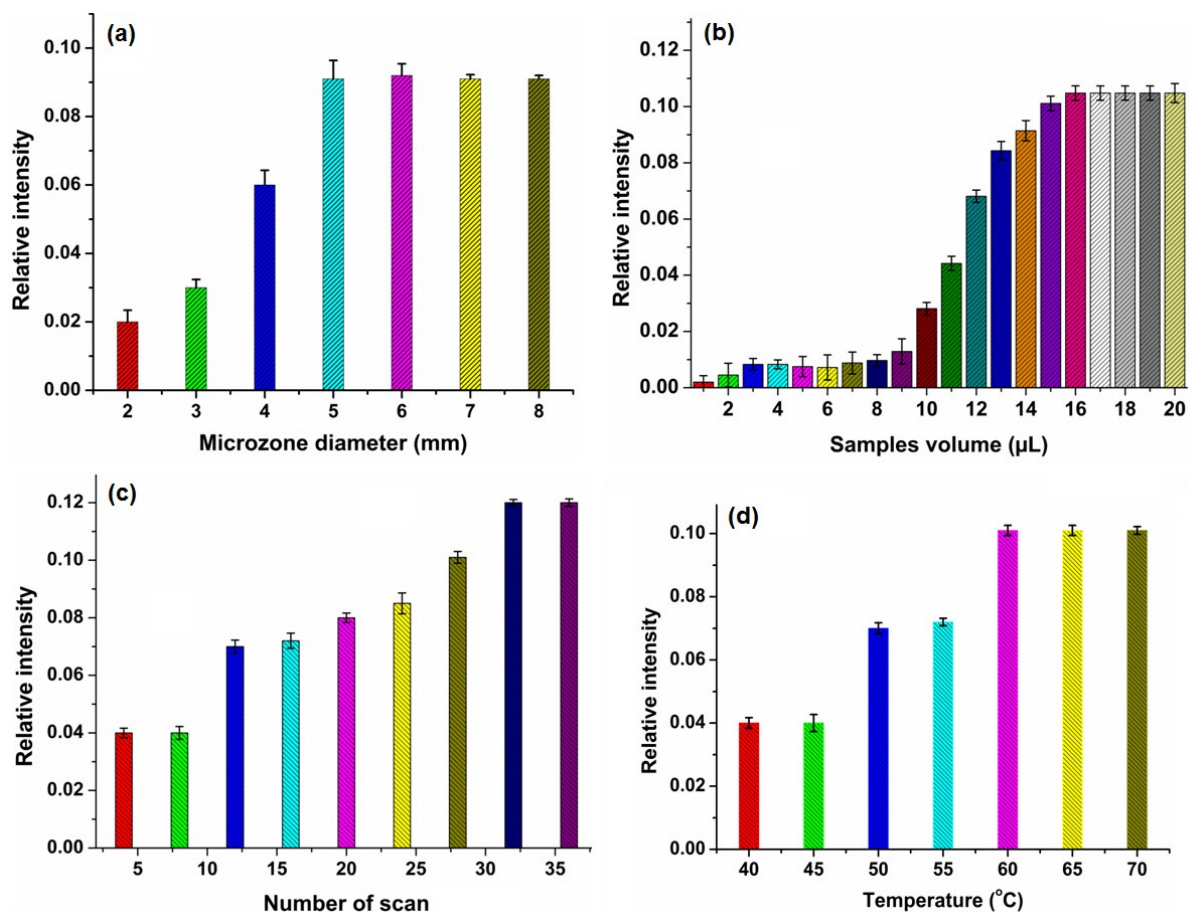

**Fig. S3.** Experimental optimization: effect of microzone diameter ( $C_{AS, NS} (10 \mu\text{gL}^{-1}) = 20 \mu\text{L}$ ; sample volume= $20 \mu\text{L}$ ; number of scan =15; temperature= $65^{\circ}\text{C}$  for 2 min) (a), effect of sample volume (paper diameter = 5mm; number of scan =15; temperature= $65^{\circ}\text{C}$  for 2 min) (b), number of scan ( $C_{AS, NS} (10 \mu\text{gL}^{-1}) = 20 \mu\text{L}$ ; paper diameter =5mm; sample volume= $20 \mu\text{L}$ ; temperature =  $65^{\circ}\text{C}$  for 2 min) (c) and effect of temperature ( $C_{AS, NS} (10 \mu\text{gL}^{-1}) = 20 \mu\text{L}$ ; paper diameter =5mm; sample volume= $20 \mu\text{L}$ ; number of scan =15) (d) for the determination of AS and NS using KBr-impregnated paper substrate.

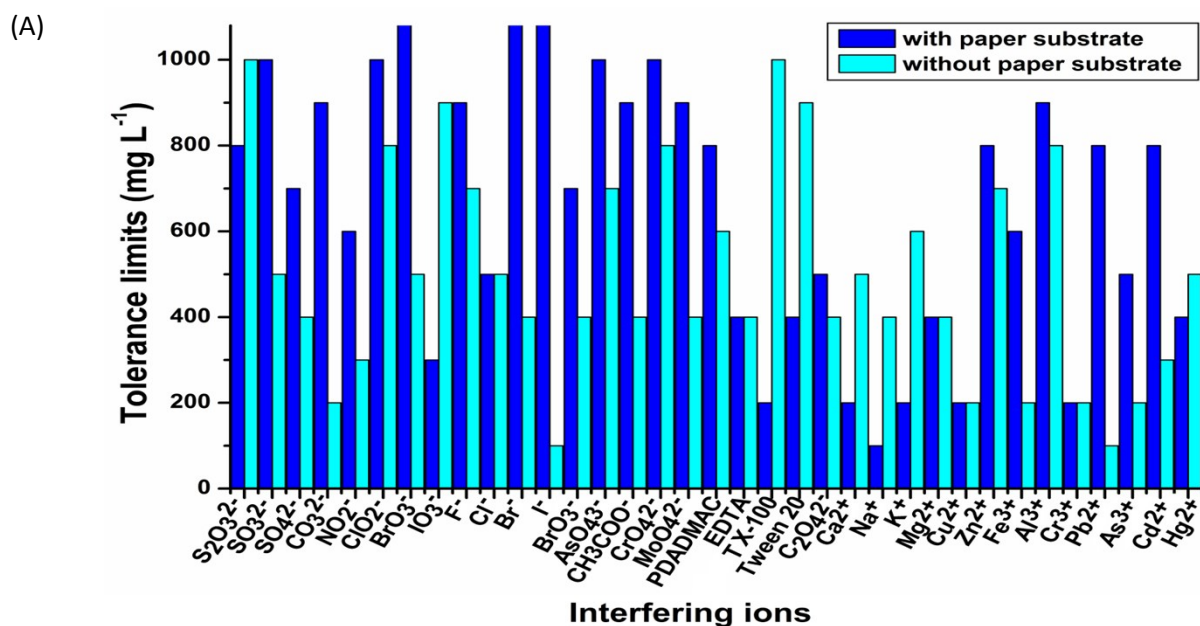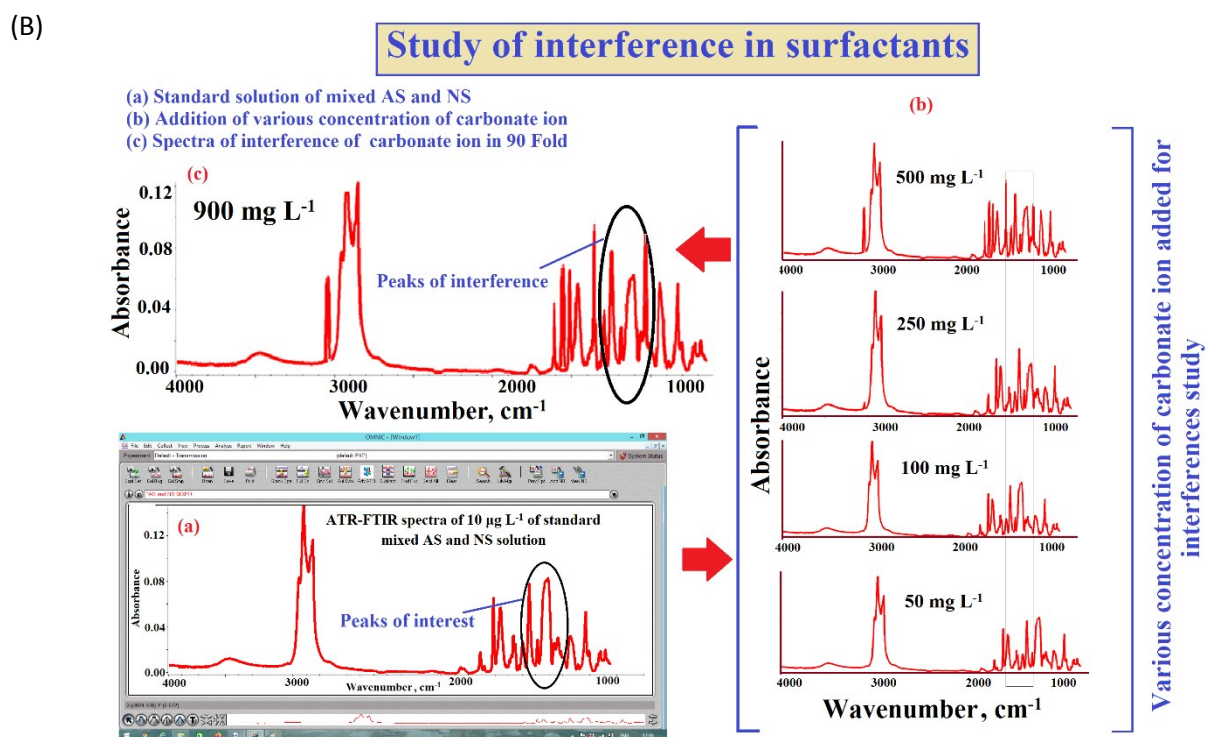

**Fig. S4.** (A) The tolerance limits of different metal ions, anions and polycation due to the test of interferences for selective determination of AS and NS with and without using paper substrate and (B) interferences on mixed AS and NS using KBr-impregnated paper coupled with ATR-FTIR ( $C_{AS, NS}$  ( $10 \mu\text{g L}^{-1}$ ) =  $20 \mu\text{L}$ ; paper diameter = 5mm; number of scan = 15; temperature =  $65^\circ\text{C}$  for 2 min; interfering ions e.g., carbonate ( $50\text{--}1000 \text{ mg L}^{-1}$ ) =  $20 \mu\text{L}$ ).

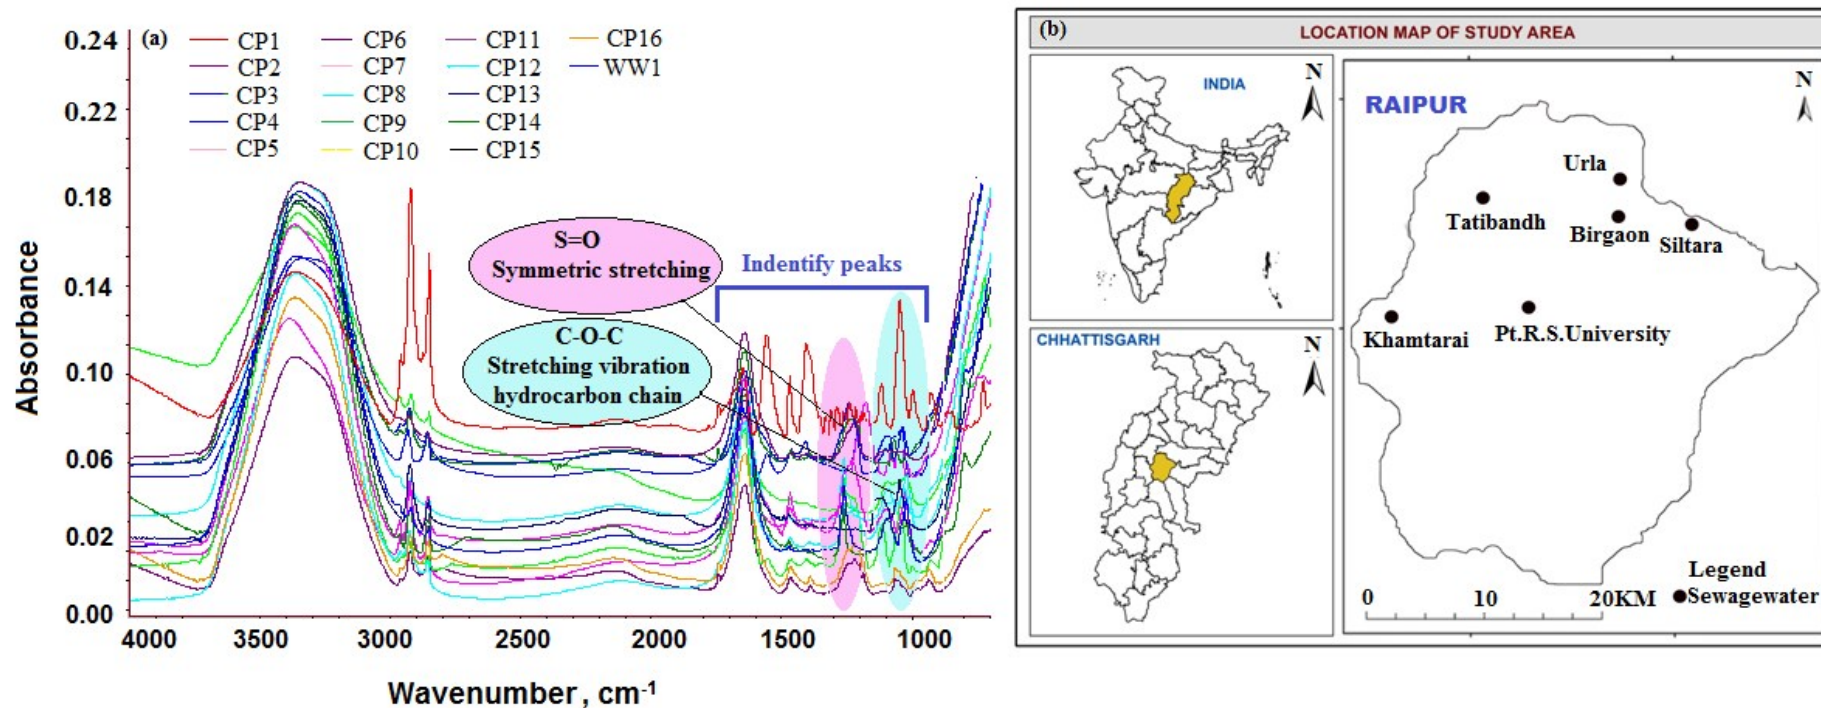

**Fig. S5.** ATR-FTIR spectra of various commodity samples using KBr-impregnated paper (a) and location map of study area for wastewater sampling (b): (commodity and water sample = 20  $\mu\text{L}$ ; paper diameter = 5mm; number of scan =15; temperature = 65°C for 2 min).

**Table S1.** Optimum instrumental condition for determination of total mixed AS and NS using KBr-impregnated GFF substrate.

| <b>Particulars</b> | <b>Descriptions</b>                                                                                      |
|--------------------|----------------------------------------------------------------------------------------------------------|
| Instrument         | Fourier-transform infrared spectrometer, Nicolet iS10, Thermo Fisher Scientific Instrument, Madison, USA |
| Technique          | Attenuated total reflectance spectroscopy                                                                |
| Software           | Omnic 9 TQ analysis                                                                                      |
| Beam splitter      | KBr                                                                                                      |
| Detector           | Deuterated, L-alanine doped triglycine sulfate (DLATGS)                                                  |
| Measurement mode   | Absorbance                                                                                               |
| Resolution         | 4 cm <sup>-1</sup>                                                                                       |
| No. of scanning    | 15                                                                                                       |
| Sample volume      | 20 μL                                                                                                    |
| Substrate          | Glass fiber filter (GFF)                                                                                 |
| Sample form        | Wet-state to dry-state                                                                                   |



**Table S2.** Infrared absorption bands and different modes of vibrations for AS and NS before and after deposition over KBr-impregnated GFF substrate  $C_{AS, NS} (100 \mu\text{gL}^{-1}) = 20 \mu\text{L}$ ; paper diameter = 5mm; number of scan =15; temperature = 65°C for 2 min).

| Surfactants                | Group                      | Peak assignment                          | Present method                                                    |                                                                | Reported spectral data of pure compound Peak ( $\text{cm}^{-1}$ ) |
|----------------------------|----------------------------|------------------------------------------|-------------------------------------------------------------------|----------------------------------------------------------------|-------------------------------------------------------------------|
|                            |                            |                                          | Without KBr-impregnated paper substrate Peak ( $\text{cm}^{-1}$ ) | With KBr-impregnated paper substrate Peak ( $\text{cm}^{-1}$ ) |                                                                   |
| AS                         | Methylene chain            | $\text{CH}_3$ Asymmetric stretching      | 2972-2950                                                         | 2919-2960                                                      | 2955-2950                                                         |
|                            | Methylene chain            | $\text{CH}_3$ Symmetric stretching       | 2853-2870                                                         | 2853-2850                                                      | 2873-2870                                                         |
|                            | Alkyl chain                | $\text{CH}_2$ Stretching Vibration       | 2919-2900                                                         | 2919-2900                                                      | 2917-2901                                                         |
|                            | Sulfate                    | $\text{S}=\text{O}$ Symmetric stretching | 1226-1200                                                         | 1226-1200                                                      | 1249-1200                                                         |
|                            | Aromatic hydrocarbon chain | $\text{CH}_2$ Bending vibration          | 1660-1500                                                         | 1616-1500                                                      | 1511-1500                                                         |
|                            | Terminal Methylene         | $\text{CH}_2$ Wagging vibration          | 1466-1450                                                         | 1466-1400                                                      | 1470-1450                                                         |
|                            | Aromatic                   | Ar-O- $\text{CH}_2$ vibration            | 989-850                                                           | 989-850                                                        | 950-800                                                           |
| NS                         | Alkyl chain                | C-H Asymmetric stretching                | 2954-2800                                                         | 2981-2954                                                      | 2880-2800                                                         |
|                            | Alkyl chain                | C-H Symmetric stretching                 | 2874-2880                                                         | 2874-2800                                                      | 2880-2840                                                         |
|                            | Aromatic                   | Ar-O- $\text{CH}_2$ vibration            | 1519-1500                                                         | 1519-1500                                                      | 1511-1500                                                         |
|                            | Terminal Methylene         | $\text{CH}_2$ Wagging vibration          | 1466-1450                                                         | 1457-1450                                                      | 1470-1450                                                         |
|                            | Acyl chain                 | $\text{C}=\text{C}$ Stretching vibration | 1250-1300                                                         | 1350-1250                                                      | 1360-1300                                                         |
|                            | Aromatic hydrocarbon chain | C-O-C Stretching vibration               | 1110-1050                                                         | 1110-1050                                                      | 1110-1050                                                         |
|                            | Mixed AS and NS            | Alkyl chain                              | C-H Asymmetric stretching                                         | 2954-2900                                                      | 2981-2900                                                         |
| Alkyl chain                |                            | C-H Symmetric stretching                 | 2874-2800                                                         | 2874-2800                                                      | ND                                                                |
| Terminal Methylene         |                            | $\text{CH}_2$ Wagging vibration          | 1466-1450                                                         | 1472-1466                                                      |                                                                   |
| Aromatic hydrocarbon chain |                            | C-O-C Stretching vibration               | 1110-1050                                                         | 1114-1050                                                      | ND                                                                |
| Sulfate                    |                            | $\text{S}=\text{O}$ Symmetric stretching | 1237-1200                                                         | 1253-1200                                                      | ND                                                                |

**Table S3.** Assay validation parameters for determination of AS and NS using KBr-impregnated paper coupled with ATR-FTIR spectroscopy.

| <b>KBr-impregnated paper/ATR-FTIR</b>         |                      | <b>MWCNT /Potentiometric titrations</b>       |                                             |
|-----------------------------------------------|----------------------|-----------------------------------------------|---------------------------------------------|
| <b>(Present method)</b>                       |                      | <b>(Reference Method)</b>                     |                                             |
| <b>Parameters</b>                             | <b>Results</b>       | <b>Parameters</b>                             | <b>Results</b>                              |
| Linearity ( $\mu\text{g L}^{-1}$ )            | 10-100               | Linearity ( $\text{mmol L}^{-1}$ )            | $2.5 \times 10^{-8}$ - $1.9 \times 10^{-3}$ |
| Accuracy (mean $\pm$ S.D)                     | $0.167 \pm 0.008$    | Accuracy (mean $\pm$ S.D)                     | 0.03-1.8                                    |
| Precision (RSD %)                             | 5.5                  | Precision (RSD %)                             | 1.8                                         |
| Intermediate precision                        | 3.2                  | Intermediate precision                        | ND                                          |
| Slope                                         | 0.049                | Slope                                         | $57.1 \pm 1.1$                              |
| Intercept                                     | 0.003                | Intercept                                     | $-41.4 \pm 4.9$                             |
| Correlation estimation (R)                    | 0.994, 0.997         | Correlation estimation                        | 0.995                                       |
| Correlation coefficient ( $R^2$ )             | 0.989, 0.994         | Correlation coefficient (R)                   | 0.998                                       |
| MDL( $\mu\text{g L}^{-1}$ )                   | 4.0                  | MDL( $\text{mmol L}^{-1}$ )                   | $1.2 \times 10^{-7}$                        |
| MQL ( $\mu\text{g L}^{-1}$ )                  | 12.0                 | MQL ( $\text{mmol L}^{-1}$ )                  | ND                                          |
| Robustness (mean $\pm$ S.D)                   | 0.008                | Robustness (mean $\pm$ S.D)                   | ND                                          |
| Concentration ranged ( $\mu\text{g L}^{-1}$ ) | 0.01-8.01            | Concentration ranged ( $\text{mmol L}^{-1}$ ) | $2.0 \times 10^{-7}$ - $1.1 \times 10^{-3}$ |
| Trueness (%)                                  | 1.5-4.1              | Trueness (%)                                  | ND                                          |
| Matrix effect ( $\mu\text{g L}^{-1}$ )        | 0.05-24.6, 19.3-75.1 | Matrix effect                                 | ND                                          |
| Recovery (%)                                  | 71.4-109.7           | Recovery (%)                                  | 99.1-102.6                                  |
| F-Test (95 % confidence limit)                | 1.5-5.4              | F-Test (95 % confidence limit)                | ND                                          |
| <i>t</i> - Test (95 % confidence limit)       | 1.0-2.4              | <i>t</i> - Test (95 % confidence limit)       | ND                                          |

ND=not detected, MWCNT=multi-walled carbon nanotubes

## Reference

1. S. Shrestha, J. Chem. Eng. Process Technol., 2016, 7, 1-11.
2. J.F. Ventura-Gayete, B.F. Reis, S. Garrigues, A. Morales-Rubio and M.de la Guardia, *Microchemical Journal*, 2004, **78**(1), 47-54.
3. D. Bach and I.R. Miller, *Biochimica et. Biophysica Acta*. 2001, **1514**, 318-326.
